# Supplementary material for: DNA Barcoding Works in Practice but Not in (Neutral) Theory
Source: PubMed Central journal article supplement (PMC4079456; doi:10.1371/journal.pone.0100755), 2014-07-02

**Fig. S1. Intraspecific COI barcode variation unrelated sample size.** Intraspecific variation vs. sample sizes from Tables S1,S2 are shown.

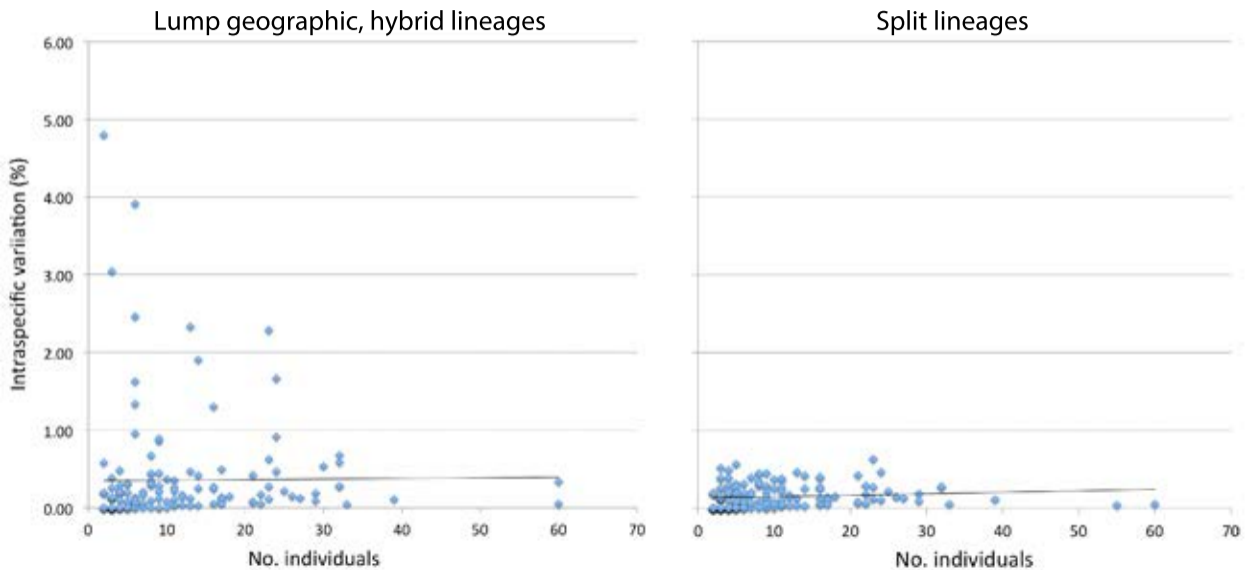

Supplement: pone.0100755.s001.pdf [file pone.0100755.s001.pdf]
