# Supplementary material for: DNA Barcoding Works in Practice but Not in (Neutral) Theory
Source: PubMed Central journal article supplement (PMC4079456; doi:10.1371/journal.pone.0100755), 2014-07-02

**Fig. S2. Collection locations for Scolopacidae species with high variation, geographic clusters.** COI NJ trees are shown at left. Collection locations include migration ranges.

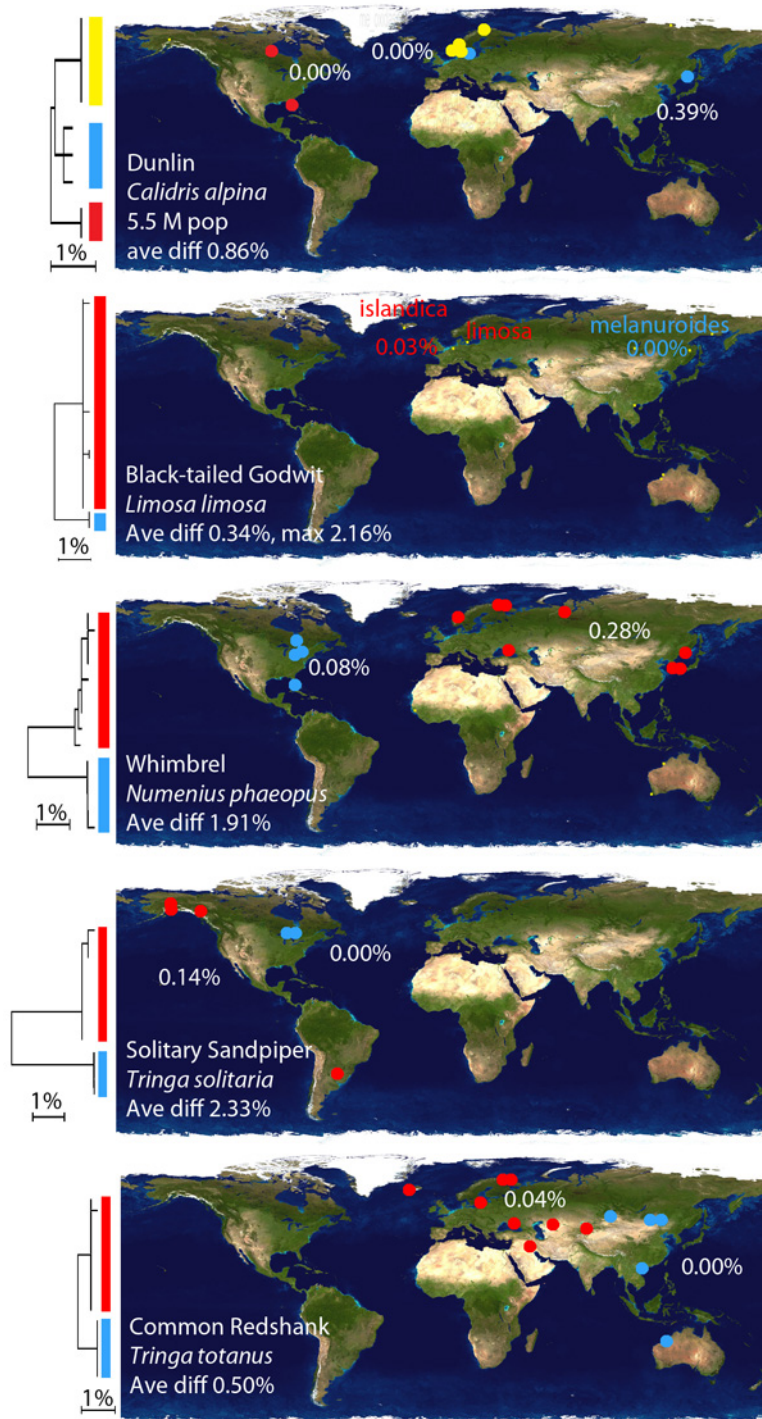

Supplement: pone.0100755.s002.pdf [file pone.0100755.s002.pdf]
