# Supplementary material for: DNA Barcoding Works in Practice but Not in (Neutral) Theory
Source: PubMed Central journal article supplement (PMC4079456; doi:10.1371/journal.pone.0100755), 2014-07-02

**Fig. S4. Collection locations for highly abundant birds with high variation, geographic clusters.** COI NJ trees are shown. Collection locations include migration ranges. Collection locations for Tropical Kingbird (*Tyrannus melancholicus*) clusters overlap in eastern Brazil.

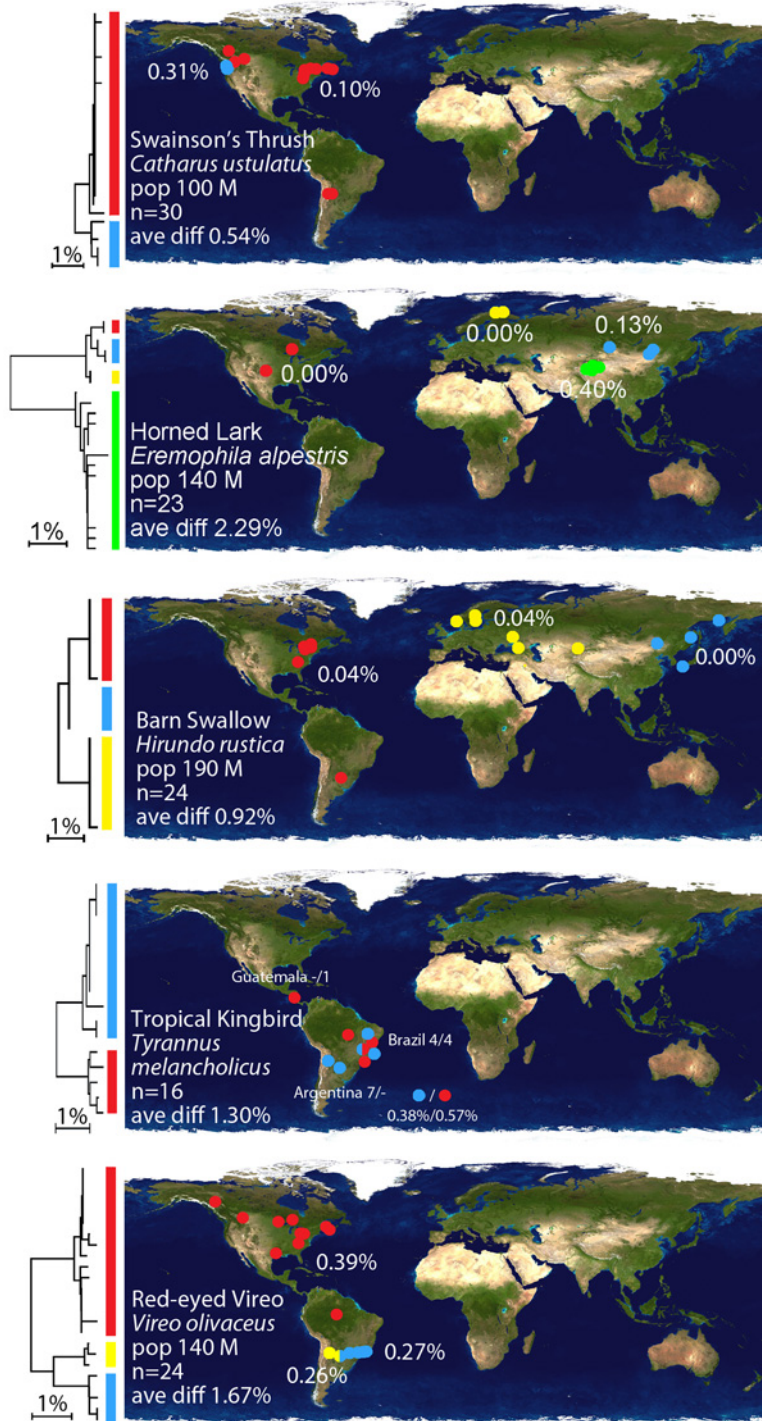

Supplement: pone.0100755.s004.pdf [file pone.0100755.s004.pdf]
