# Supplementary material for: DNA Barcoding Works in Practice but Not in (Neutral) Theory
Source: PubMed Central journal article supplement (PMC4079456; doi:10.1371/journal.pone.0100755), 2014-07-02
Supplement: pone.0100755.s005.pdf [file pone.0100755.s005.pdf]

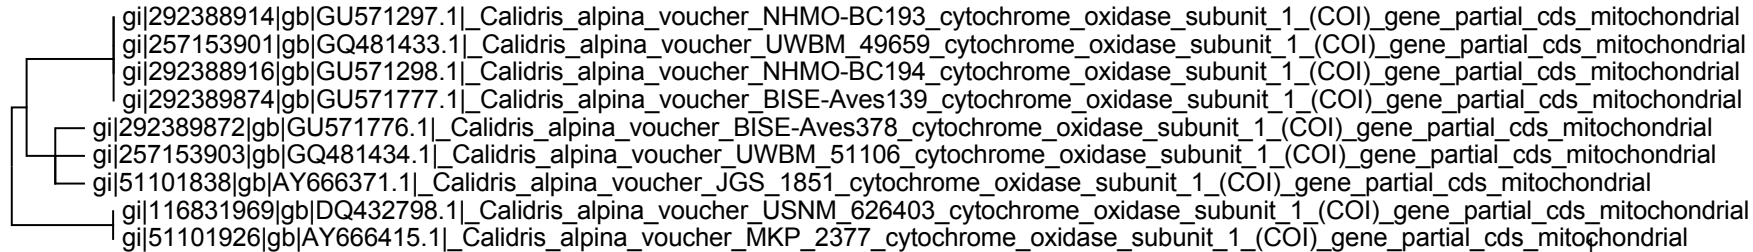

0.01



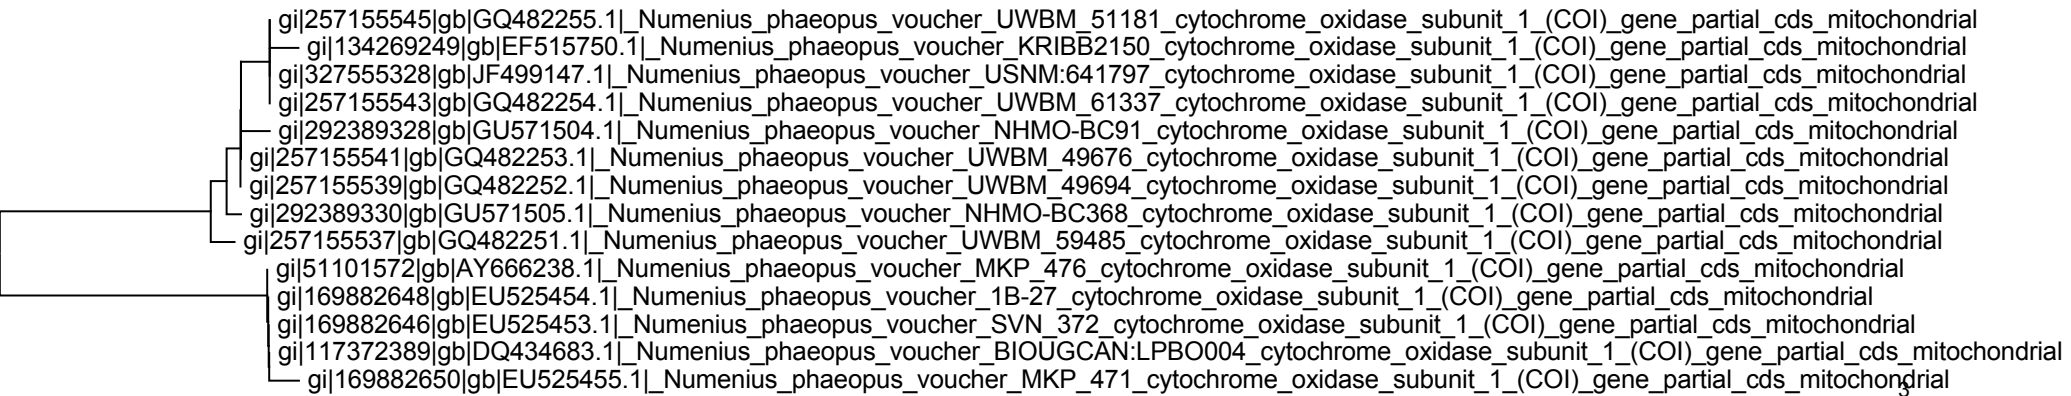

0.01

gi|116832859|gb|DQ433243.1|\_Tringa\_solitaria\_voucher\_USNM\_601826\_cytochrome\_oxidase\_subunit\_1\_(COI)\_gene\_partial\_cds\_mitochondrial  
gi|294514336|gb|HM033842.1|\_Tringa\_solitaria\_voucher\_BIOUGCAN:TLBS\_195149287\_cytochrome\_oxidase\_subunit\_1\_(COI)\_gene\_partial\_cds\_mitochondrial  
gi|51102160|gb|AY666532.1|\_Tringa\_solitaria\_voucher\_JGS\_1907\_cytochrome\_oxidase\_subunit\_1\_(COI)\_gene\_partial\_cds\_mitochondrial  
gi|51102168|gb|AY666536.1|\_Tringa\_solitaria\_voucher\_JGS\_1893\_cytochrome\_oxidase\_subunit\_1\_(COI)\_gene\_partial\_cds\_mitochondrial  
gi|51102148|gb|AY666526.1|\_Tringa\_solitaria\_voucher\_JGS\_1896\_cytochrome\_oxidase\_subunit\_1\_(COI)\_gene\_partial\_cds\_mitochondrial  
gi|51102144|gb|AY666524.1|\_Tringa\_solitaria\_voucher\_JGS\_1895\_cytochrome\_oxidase\_subunit\_1\_(COI)\_gene\_partial\_cds\_mitochondrial  
gi|51101492|gb|AY666198.1|\_Tringa\_solitaria\_voucher\_JGS\_1893\_cytochrome\_oxidase\_subunit\_1\_(COI)\_gene\_partial\_cds\_mitochondrial  
gi|197257161|gb|FJ028457.1|\_Tringa\_solitaria\_voucher\_MACN-Or-ct\_1750\_cytochrome\_oxidase\_subunit\_1\_(COI)\_gene\_partial\_cds\_mitochondrial  
gi|197257159|gb|FJ028456.1|\_Tringa\_solitaria\_voucher\_MACN-Or-ct\_1735\_cytochrome\_oxidase\_subunit\_1\_(COI)\_gene\_partial\_cds\_mitochondrial  
gi|51102180|gb|AY666542.1|\_Tringa\_solitaria\_voucher\_MKP\_337\_cytochrome\_oxidase\_subunit\_1\_(COI)\_gene\_partial\_cds\_mitochondrial  
gi|51101494|gb|AY666199.1|\_Tringa\_solitaria\_voucher\_1B-781\_cytochrome\_oxidase\_subunit\_1\_(COI)\_gene\_partial\_cds\_mitochondrial  
gi|51102156|gb|AY666530.1|\_Tringa\_solitaria\_voucher\_MKP\_335\_cytochrome\_oxidase\_subunit\_1\_(COI)\_gene\_partial\_cds\_mitochondrial  
gi|51102164|gb|AY666534.1|\_Tringa\_solitaria\_voucher\_MKP\_336\_cytochrome\_oxidase\_subunit\_1\_(COI)\_gene\_partial\_cds\_mitochondrial

0.01

gi|292390602|gb|GU572141.1|\_Tringa\_totanus\_voucher\_BISE-Aves190\_cytochrome\_oxidase\_subunit\_1\_(COI)\_gene\_partial\_cds\_mitochondrial  
— gi|169882902|gb|EU525581.1|\_Tringa\_totanus\_voucher\_MKP\_1572\_cytochrome\_oxidase\_subunit\_1\_(COI)\_gene\_partial\_cds\_mitochondrial  
gi|292390600|gb|GU572140.1|\_Tringa\_totanus\_voucher\_BISE-Aves318\_cytochrome\_oxidase\_subunit\_1\_(COI)\_gene\_partial\_cds\_mitochondrial  
gi|292389646|gb|GU571663.1|\_Tringa\_totanus\_voucher\_NHMO-BC84\_cytochrome\_oxidase\_subunit\_1\_(COI)\_gene\_partial\_cds\_mitochondrial  
gi|292389648|gb|GU571664.1|\_Tringa\_totanus\_voucher\_NHMO-BC206\_cytochrome\_oxidase\_subunit\_1\_(COI)\_gene\_partial\_cds\_mitochondrial  
gi|257156633|gb|GQ482799.1|\_Tringa\_totanus\_voucher\_UWBM\_46266\_cytochrome\_oxidase\_subunit\_1\_(COI)\_gene\_partial\_cds\_mitochondrial  
gi|257156625|gb|GQ482795.1|\_Tringa\_totanus\_voucher\_UWBM\_49714\_cytochrome\_oxidase\_subunit\_1\_(COI)\_gene\_partial\_cds\_mitochondrial  
gi|257156635|gb|GQ482800.1|\_Tringa\_totanus\_voucher\_UWBM\_61033\_cytochrome\_oxidase\_subunit\_1\_(COI)\_gene\_partial\_cds\_mitochondrial  
gi|169882908|gb|EU525584.1|\_Tringa\_totanus\_voucher\_MKP\_1570\_cytochrome\_oxidase\_subunit\_1\_(COI)\_gene\_partial\_cds\_mitochondrial  
gi|169882906|gb|EU525583.1|\_Tringa\_totanus\_voucher\_MKP\_1568\_cytochrome\_oxidase\_subunit\_1\_(COI)\_gene\_partial\_cds\_mitochondrial  
gi|169882904|gb|EU525582.1|\_Tringa\_totanus\_voucher\_MKP\_1567\_cytochrome\_oxidase\_subunit\_1\_(COI)\_gene\_partial\_cds\_mitochondrial  
gi|169882914|gb|EU525587.1|\_Tringa\_totanus\_voucher\_MKP\_2775\_cytochrome\_oxidase\_subunit\_1\_(COI)\_gene\_partial\_cds\_mitochondrial  
gi|169882910|gb|EU525585.1|\_Tringa\_totanus\_voucher\_MKP\_2240\_cytochrome\_oxidase\_subunit\_1\_(COI)\_gene\_partial\_cds\_mitochondrial  
gi|257156627|gb|GQ482796.1|\_Tringa\_totanus\_voucher\_UWBM\_59800\_cytochrome\_oxidase\_subunit\_1\_(COI)\_gene\_partial\_cds\_mitochondrial  
gi|257156631|gb|GQ482798.1|\_Tringa\_totanus\_voucher\_UWBM\_66352\_cytochrome\_oxidase\_subunit\_1\_(COI)\_gene\_partial\_cds\_mitochondrial  
gi|257156629|gb|GQ482797.1|\_Tringa\_totanus\_voucher\_UWBM\_59942\_cytochrome\_oxidase\_subunit\_1\_(COI)\_gene\_partial\_cds\_mitochondrial  
gi|169882912|gb|EU525586.1|\_Tringa\_totanus\_voucher\_MKP\_2774\_cytochrome\_oxidase\_subunit\_1\_(COI)\_gene\_partial\_cds\_mitochondrial

0.01

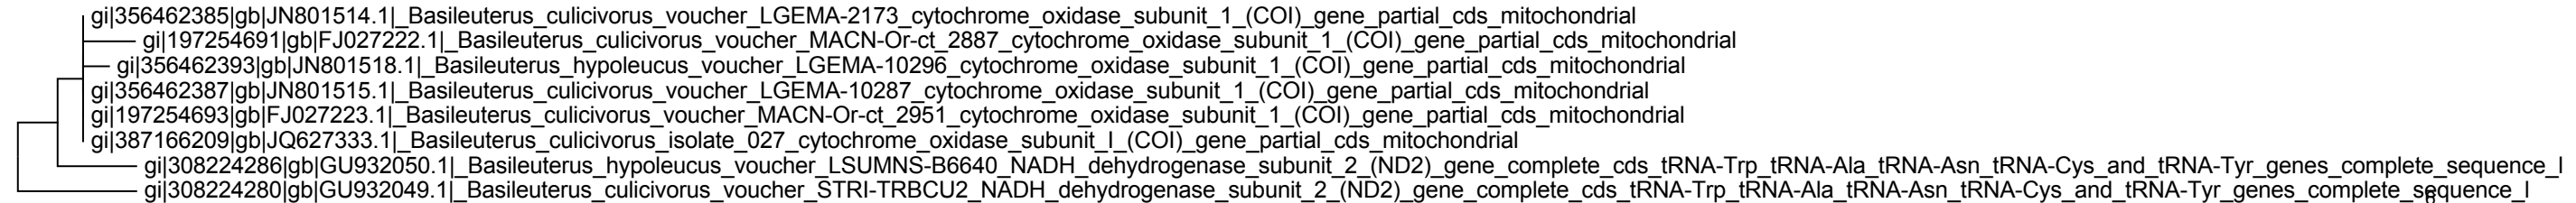

0.01

gi|294514582|gb|HM033965.1|\_Wilsonia\_pusilla\_voucher\_BIOUGCAN:MKNO\_2330\_35625\_cytochrome\_oxidase\_subunit\_1\_(COI)\_gene\_partial\_cds\_mitochondrial  
 gi|294514604|gb|HM033976.1|\_Wilsonia\_pusilla\_voucher\_BIOUGCAN:VLBO\_2300-63659\_cytochrome\_oxidase\_subunit\_1\_(COI)\_gene\_partial\_cds\_mitochondrial  
 gi|294514596|gb|HM033972.1|\_Wilsonia\_pusilla\_voucher\_BIOUGCAN:VLBO\_2300-63663\_cytochrome\_oxidase\_subunit\_1\_(COI)\_gene\_partial\_cds\_mitochondrial  
 gi|294514588|gb|HM033968.1|\_Wilsonia\_pusilla\_voucher\_BIOUGCAN:MKNO\_2330\_35644\_cytochrome\_oxidase\_subunit\_1\_(COI)\_gene\_partial\_cds\_mitochondrial  
 gi|294514574|gb|HM033961.1|\_Wilsonia\_pusilla\_voucher\_BIOUGCAN:MKNO\_2330\_35671\_cytochrome\_oxidase\_subunit\_1\_(COI)\_gene\_partial\_cds\_mitochondrial  
 gi|294514612|gb|HM033980.1|\_Wilsonia\_pusilla\_voucher\_BIOUGCAN:IWBS\_2300-07279\_cytochrome\_oxidase\_subunit\_1\_(COI)\_gene\_partial\_cds\_mitochondrial  
 gi|294514592|gb|HM033970.1|\_Wilsonia\_pusilla\_voucher\_BIOUGCAN:RPBO\_2410\_30331\_cytochrome\_oxidase\_subunit\_1\_(COI)\_gene\_partial\_cds\_mitochondrial  
 gi|294514572|gb|HM033960.1|\_Wilsonia\_pusilla\_voucher\_BIOUGCAN:MKNO\_2330\_35779\_cytochrome\_oxidase\_subunit\_1\_(COI)\_gene\_partial\_cds\_mitochondrial  
 gi|294514570|gb|HM033959.1|\_Wilsonia\_pusilla\_voucher\_BIOUGCAN:RPBO\_2410\_30287\_cytochrome\_oxidase\_subunit\_1\_(COI)\_gene\_partial\_cds\_mitochondrial  
 gi|294514590|gb|HM033969.1|\_Wilsonia\_pusilla\_voucher\_BIOUGCAN:RPBO\_2410\_30339\_cytochrome\_oxidase\_subunit\_1\_(COI)\_gene\_partial\_cds\_mitochondrial  
 gi|294514606|gb|HM033977.1|\_Wilsonia\_pusilla\_voucher\_BIOUGCAN:RPBO\_2410\_30343\_cytochrome\_oxidase\_subunit\_1\_(COI)\_gene\_partial\_cds\_mitochondrial  
 gi|294514576|gb|HM033962.1|\_Wilsonia\_pusilla\_voucher\_BIOUGCAN:MKNO\_2330\_35666\_cytochrome\_oxidase\_subunit\_1\_(COI)\_gene\_partial\_cds\_mitochondrial  
 gi|294514600|gb|HM033974.1|\_Wilsonia\_pusilla\_voucher\_BIOUGCAN:IWBS\_2300-07482\_cytochrome\_oxidase\_subunit\_1\_(COI)\_gene\_partial\_cds\_mitochondrial  
 gi|294514594|gb|HM033971.1|\_Wilsonia\_pusilla\_voucher\_BIOUGCAN:IWBS\_2300-07278\_cytochrome\_oxidase\_subunit\_1\_(COI)\_gene\_partial\_cds\_mitochondrial  
 gi|294514610|gb|HM033979.1|\_Wilsonia\_pusilla\_voucher\_BIOUGCAN:IWBS\_2300-07484\_cytochrome\_oxidase\_subunit\_1\_(COI)\_gene\_partial\_cds\_mitochondrial  
 gi|377685645|gb|JN850662.1|\_Wilsonia\_pusilla\_isolate\_C06\_168\_cytochrome\_oxidase\_subunit\_1\_(COI)\_gene\_partial\_cds\_mitochondrial  
 gi|294514580|gb|HM033964.1|\_Wilsonia\_pusilla\_voucher\_BIOUGCAN:VLBO\_2300-63660\_cytochrome\_oxidase\_subunit\_1\_(COI)\_gene\_partial\_cds\_mitochondrial  
 gi|294514598|gb|HM033973.1|\_Wilsonia\_pusilla\_voucher\_BIOUGCAN:IWBS\_2300-07468\_cytochrome\_oxidase\_subunit\_1\_(COI)\_gene\_partial\_cds\_mitochondrial  
 gi|116832911|gb|DQ433269.1|\_Wilsonia\_pusilla\_voucher\_USNM\_601731\_cytochrome\_oxidase\_subunit\_1\_(COI)\_gene\_partial\_cds\_mitochondrial  
 gi|294514578|gb|HM033963.1|\_Wilsonia\_pusilla\_voucher\_BIOUGCAN:RPBO\_2410\_30340\_cytochrome\_oxidase\_subunit\_1\_(COI)\_gene\_partial\_cds\_mitochondrial  
 gi|294514602|gb|HM033975.1|\_Wilsonia\_pusilla\_voucher\_BIOUGCAN:VLBO\_2300-63666\_cytochrome\_oxidase\_subunit\_1\_(COI)\_gene\_partial\_cds\_mitochondrial  
 gi|308224758|gb|GU932129.1|\_Wilsonia\_pusilla\_voucher\_UWBM-47919\_NADH\_dehydrogenase\_subunit\_2\_(ND2)\_gene\_complete\_cds\_tRNA-Trp\_tRNA-Ala\_tRNA-Asn\_tRNA-Cys\_and\_tRNA-Tyr\_genes\_complete\_sequence\_cytochromi  
 gi|117372683|gb|DQ434830.1|\_Wilsonia\_pusilla\_voucher\_BIOUGCAN:LPBO2330-21355\_cytochrome\_oxidase\_subunit\_1\_(COI)\_gene\_partial\_cds\_mitochondrial  
 gi|294514564|gb|HM033956.1|\_Wilsonia\_pusilla\_voucher\_BIOUGCAN:GMNP\_2330-14115\_cytochrome\_oxidase\_subunit\_1\_(COI)\_gene\_partial\_cds\_mitochondrial  
 gi|294514584|gb|HM033966.1|\_Wilsonia\_pusilla\_voucher\_BIOUGCAN:BINS\_2180\_46579\_cytochrome\_oxidase\_subunit\_1\_(COI)\_gene\_partial\_cds\_mitochondrial  
 gi|294514586|gb|HM033967.1|\_Wilsonia\_pusilla\_voucher\_BIOUGCAN:BINS\_2180\_46129\_cytochrome\_oxidase\_subunit\_1\_(COI)\_gene\_partial\_cds\_mitochondrial  
 gi|294514608|gb|HM033978.1|\_Wilsonia\_pusilla\_voucher\_BIOUGCAN:MBO\_2410-92339\_cytochrome\_oxidase\_subunit\_1\_(COI)\_gene\_partial\_cds\_mitochondrial  
 gi|294514566|gb|HM033957.1|\_Wilsonia\_pusilla\_voucher\_BIOUGCAN:BIBS\_218046068\_cytochrome\_oxidase\_subunit\_1\_(COI)\_gene\_partial\_cds\_mitochondrial  
 gi|117372681|gb|DQ434829.1|\_Wilsonia\_pusilla\_voucher\_BIOUGCAN:HBO2300-69743\_cytochrome\_oxidase\_subunit\_1\_(COI)\_gene\_partial\_cds\_mitochondrial  
 gi|294514568|gb|HM033958.1|\_Wilsonia\_pusilla\_voucher\_BIOUGCAN:GMNP\_2330-14156\_cytochrome\_oxidase\_subunit\_1\_(COI)\_gene\_partial\_cds\_mitochondrial  
 gi|51102264|gb|AY666584.1|\_Wilsonia\_pusilla\_voucher\_1B-2090\_cytochrome\_oxidase\_subunit\_1\_(COI)\_gene\_partial\_cds\_mitochondrial  
 gi|117372679|gb|DQ434828.1|\_Wilsonia\_pusilla\_voucher\_BIOUGCAN:SPP2300-03641\_cytochrome\_oxidase\_subunit\_1\_(COI)\_gene\_partial\_cds\_mitochondrial  
 gi|117372685|gb|DQ434831.1|\_Wilsonia\_pusilla\_voucher\_BIOUGCAN:SPP2300-03648\_cytochrome\_oxidase\_subunit\_1\_(COI)\_gene\_partial\_cds\_mitochondrial

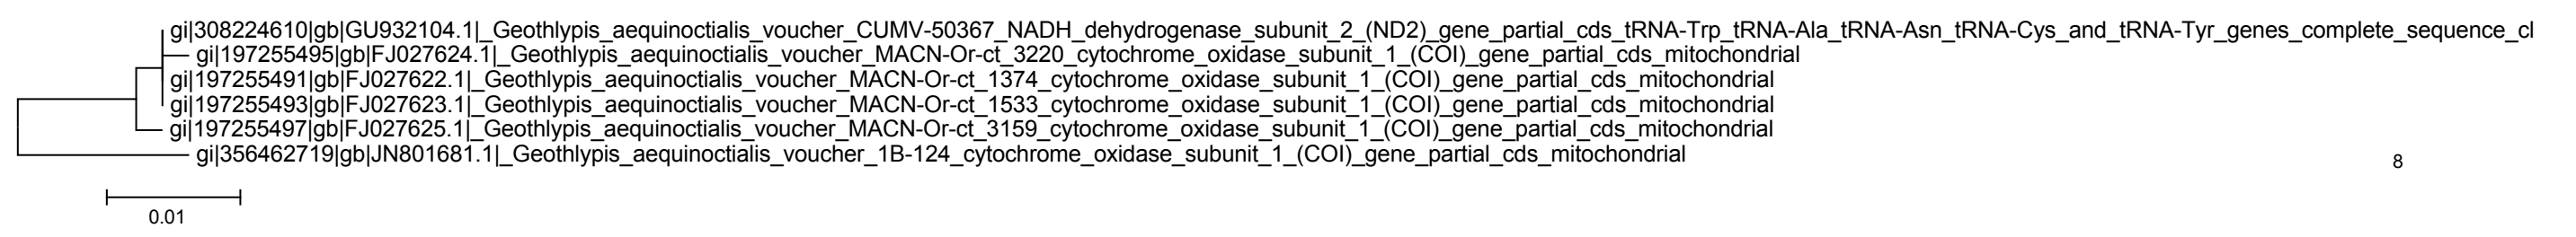



gi|197255999|gb|FJ027876.1|\_Myioborus\_brunniceps\_voucher\_MACN-Or-ct\_750\_cytochrome\_oxidase\_subunit\_1\_(COI)\_gene\_partial\_cds\_mitochondrial  
gi|308224670|gb|GU932114.1|\_Myioborus\_brunniceps\_voucher\_UWBM-DAB760\_NADH\_dehydrogenase\_subunit\_2\_(ND2)\_gene\_complete\_cds\_tRNA-Trp\_tRNA-Ala\_tRNA-Asn\_tRNA-Cys\_and\_tRNA-Tyr\_genes\_complete\_sequence\_cytol  
gi|197256001|gb|FJ027877.1|\_Myioborus\_brunniceps\_voucher\_MACN-Or-ct\_706\_cytochrome\_oxidase\_subunit\_1\_(COI)\_gene\_partial\_cds\_mitochondrial  
gi|197256003|gb|FJ027878.1|\_Myioborus\_brunniceps\_voucher\_MACN-Or-ct\_943\_cytochrome\_oxidase\_subunit\_1\_(COI)\_gene\_partial\_cds\_mitochondrial  
gi|308224676|gb|GU932115.1|\_Myioborus\_brunniceps\_voucher\_FMNH-339730\_NADH\_dehydrogenase\_subunit\_2\_(ND2)\_gene\_complete\_cds\_tRNA-Trp\_tRNA-Ala\_tRNA-Asn\_tRNA-Cys\_and\_tRNA-Tyr\_genes\_complete\_sequence\_cytol  
gi|359283147|gb|JQ175438.1|\_Myioborus\_brunniceps\_voucher\_USNM:Birds:626863\_cytochrome\_oxidase\_subunit\_1\_(COI)\_gene\_partial\_cds\_mitochondrial

0.01

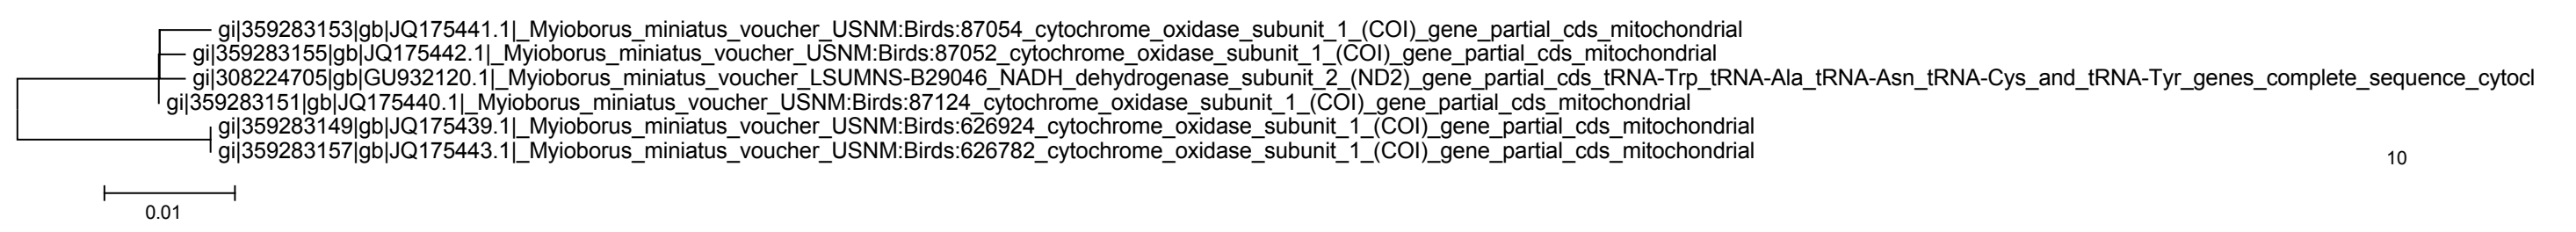

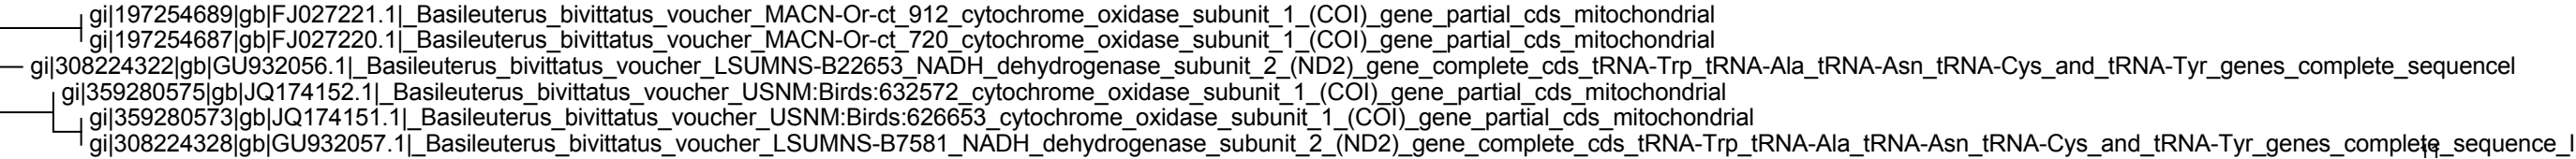

0.01

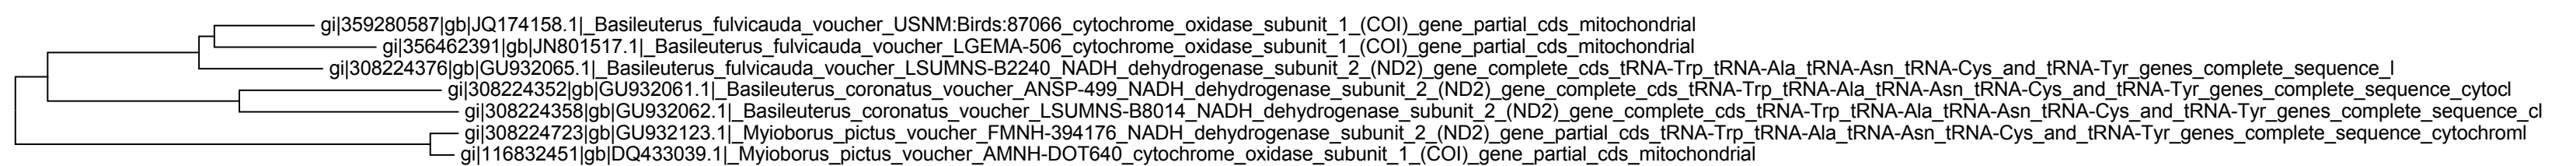

0.01

gi|117581286|gb|DQ434804.1|\_Vermivora\_ruficapilla\_voucher\_BIOUGCAN:SPP2300-03413\_cytochrome\_oxidase\_subunit\_1\_(COI)\_gene\_partial\_cds\_mitochondrial  
 gi|117372627|gb|DQ434802.1|\_Vermivora\_ruficapilla\_voucher\_BIOUGCAN:LPBO2330-21143\_cytochrome\_oxidase\_subunit\_1\_(COI)\_gene\_partial\_cds\_mitochondrial  
 gi|117372629|gb|DQ434803.1|\_Vermivora\_ruficapilla\_voucher\_BIOUGCAN:HBO2300-69601\_cytochrome\_oxidase\_subunit\_1\_(COI)\_gene\_partial\_cds\_mitochondrial  
 gi|294514462|gb|HM033905.1|\_Vermivora\_ruficapilla\_voucher\_BIOUGCAN:BIBS\_215066888\_cytochrome\_oxidase\_subunit\_1\_(COI)\_gene\_partial\_cds\_mitochondrial  
 gi|294514464|gb|HM033906.1|\_Vermivora\_ruficapilla\_voucher\_BIOUGCAN:BIBS\_215066966\_cytochrome\_oxidase\_subunit\_1\_(COI)\_gene\_partial\_cds\_mitochondrial  
 gi|51102186|gb|AY666545.1|\_Vermivora\_ruficapilla\_voucher\_1B-2322\_cytochrome\_oxidase\_subunit\_1\_(COI)\_gene\_partial\_cds\_mitochondrial  
 gi|294514466|gb|HM033907.1|\_Vermivora\_ruficapilla\_voucher\_BIOUGCAN:BINS\_2180\_46481\_cytochrome\_oxidase\_subunit\_1\_(COI)\_gene\_partial\_cds\_mitochondrial  
 gi|308224788|gb|GU932134.1|\_Vermivora\_ruficapilla\_voucher\_UWBM-49896\_NADH\_dehydrogenase\_subunit\_2\_(ND2)\_gene\_complete\_cds\_tRNA-Trp\_tRNA-Ala\_tRNA-Asn\_tRNA-Cys\_and\_tRNA-Tyr\_genes\_complete\_sequence\_cytol  
 gi|377685861|gb|JN850770.1|\_Vermivora\_ruficapilla\_isolate\_V06\_218\_cytochrome\_oxidase\_subunit\_1\_(COI)\_gene\_partial\_cds\_mitochondrial

0.01

gi|294513450|gb|HM033399.1|\_Setophaga\_petechia\_voucher\_BIOUGCAN:RPBO\_2370\_62652\_cytochrome\_oxidase\_subunit\_1\_(COI)\_gene\_partial\_cds\_mitochondrial  
— gi|294513456|gb|HM033402.1|\_Setophaga\_petechia\_voucher\_BIOUGCAN:IWBS\_2430-31102\_cytochrome\_oxidase\_subunit\_1\_(COI)\_gene\_partial\_cds\_mitochondrial  
gi|294513468|gb|HM033408.1|\_Setophaga\_petechia\_voucher\_BIOUGCAN:IWBS\_2290-37158\_cytochrome\_oxidase\_subunit\_1\_(COI)\_gene\_partial\_cds\_mitochondrial  
gi|294513454|gb|HM033401.1|\_Setophaga\_petechia\_voucher\_BIOUGCAN:RPBO\_2370\_62645\_cytochrome\_oxidase\_subunit\_1\_(COI)\_gene\_partial\_cds\_mitochondrial  
gi|377685765|gb|JN850722.1|\_Setophaga\_petechia\_isolate\_S05\_2110\_cytochrome\_oxidase\_subunit\_1\_(COI)\_gene\_partial\_cds\_mitochondrial  
gi|294513464|gb|HM033406.1|\_Setophaga\_petechia\_voucher\_BIOUGCAN:IWBS\_2290-37172\_cytochrome\_oxidase\_subunit\_1\_(COI)\_gene\_partial\_cds\_mitochondrial  
— gi|294513466|gb|HM033407.1|\_Setophaga\_petechia\_voucher\_BIOUGCAN:VLBO\_2360-32856\_cytochrome\_oxidase\_subunit\_1\_(COI)\_gene\_partial\_cds\_mitochondrial  
gi|294513474|gb|HM033411.1|\_Setophaga\_petechia\_voucher\_BIOUGCAN:IWBS\_2290-37176b\_cytochrome\_oxidase\_subunit\_1\_(COI)\_gene\_partial\_cds\_mitochondrial  
gi|294513462|gb|HM033405.1|\_Setophaga\_petechia\_voucher\_BIOUGCAN:IWBS\_2290-37176a\_cytochrome\_oxidase\_subunit\_1\_(COI)\_gene\_partial\_cds\_mitochondrial  
gi|294513448|gb|HM033398.1|\_Setophaga\_petechia\_voucher\_BIOUGCAN:RPBO\_2370\_62644\_cytochrome\_oxidase\_subunit\_1\_(COI)\_gene\_partial\_cds\_mitochondrial  
— gi|294513476|gb|HM033412.1|\_Setophaga\_petechia\_voucher\_BIOUGCAN:MKNO\_2330\_35932\_cytochrome\_oxidase\_subunit\_1\_(COI)\_gene\_partial\_cds\_mitochondrial  
gi|294513446|gb|HM033397.1|\_Setophaga\_petechia\_voucher\_BIOUGCAN:IWBS\_2290-37171\_cytochrome\_oxidase\_subunit\_1\_(COI)\_gene\_partial\_cds\_mitochondrial  
gi|294513470|gb|HM033409.1|\_Setophaga\_petechia\_voucher\_BIOUGCAN:RPBO\_2370\_62660\_cytochrome\_oxidase\_subunit\_1\_(COI)\_gene\_partial\_cds\_mitochondrial  
gi|294513458|gb|HM033403.1|\_Setophaga\_petechia\_voucher\_BIOUGCAN:VLBO\_2360-32895\_cytochrome\_oxidase\_subunit\_1\_(COI)\_gene\_partial\_cds\_mitochondrial  
gi|116832165|gb|DQ432896.1|\_Dendroica\_petechia\_voucher\_USNM\_586089\_cytochrome\_oxidase\_subunit\_1\_(COI)\_gene\_partial\_cds\_mitochondrial  
gi|294513484|gb|HM033416.1|\_Setophaga\_petechia\_voucher\_BIOUGCAN:MKNO\_2330\_74380\_cytochrome\_oxidase\_subunit\_1\_(COI)\_gene\_partial\_cds\_mitochondrial  
gi|294513460|gb|HM033404.1|\_Setophaga\_petechia\_voucher\_BIOUGCAN:MBO\_1840-76996\_cytochrome\_oxidase\_subunit\_1\_(COI)\_gene\_partial\_cds\_mitochondrial  
gi|294513490|gb|HM033419.1|\_Setophaga\_petechia\_voucher\_BIOUGCAN:BIBS\_221033798\_cytochrome\_oxidase\_subunit\_1\_(COI)\_gene\_partial\_cds\_mitochondrial  
gi|294513488|gb|HM033418.1|\_Setophaga\_petechia\_voucher\_BIOUGCAN:BIBS\_221033797\_cytochrome\_oxidase\_subunit\_1\_(COI)\_gene\_partial\_cds\_mitochondrial  
gi|294513486|gb|HM033417.1|\_Setophaga\_petechia\_voucher\_BIOUGCAN:GMNP\_2370-85968\_cytochrome\_oxidase\_subunit\_1\_(COI)\_gene\_partial\_cds\_mitochondrial  
gi|294513482|gb|HM033415.1|\_Setophaga\_petechia\_voucher\_BIOUGCAN:GMNP\_2370-85936\_cytochrome\_oxidase\_subunit\_1\_(COI)\_gene\_partial\_cds\_mitochondrial  
gi|294513480|gb|HM033414.1|\_Setophaga\_petechia\_voucher\_BIOUGCAN:GMNP\_2370-85972\_cytochrome\_oxidase\_subunit\_1\_(COI)\_gene\_partial\_cds\_mitochondrial  
gi|294513478|gb|HM033413.1|\_Setophaga\_petechia\_voucher\_BIOUGCAN:GMNP\_2440-35721\_cytochrome\_oxidase\_subunit\_1\_(COI)\_gene\_partial\_cds\_mitochondrial  
gi|294513472|gb|HM033410.1|\_Setophaga\_petechia\_voucher\_BIOUGCAN:MBO\_1840-76993\_cytochrome\_oxidase\_subunit\_1\_(COI)\_gene\_partial\_cds\_mitochondrial  
gi|294513452|gb|HM033400.1|\_Setophaga\_petechia\_voucher\_BIOUGCAN:MBO\_1840-76994\_cytochrome\_oxidase\_subunit\_1\_(COI)\_gene\_partial\_cds\_mitochondrial  
gi|294513442|gb|HM033395.1|\_Setophaga\_petechia\_voucher\_BIOUGCAN:ABO\_2490-26146\_cytochrome\_oxidase\_subunit\_1\_(COI)\_gene\_partial\_cds\_mitochondrial  
gi|294513440|gb|HM033394.1|\_Setophaga\_petechia\_voucher\_BIOUGCAN:ABO\_2490-26159\_cytochrome\_oxidase\_subunit\_1\_(COI)\_gene\_partial\_cds\_mitochondrial  
gi|117372175|gb|DQ434576.1|\_Setophaga\_petechia\_voucher\_BIOUGCAN:SPP2340-77130\_cytochrome\_oxidase\_subunit\_1\_(COI)\_gene\_partial\_cds\_mitochondrial  
gi|117372173|gb|DQ434575.1|\_Setophaga\_petechia\_voucher\_BIOUGCAN:LPBO2330-21147\_cytochrome\_oxidase\_subunit\_1\_(COI)\_gene\_partial\_cds\_mitochondrial  
gi|117372177|gb|DQ434577.1|\_Setophaga\_petechia\_voucher\_BIOUGCAN:SPP2340-77043\_cytochrome\_oxidase\_subunit\_1\_(COI)\_gene\_partial\_cds\_mitochondrial  
gi|294513444|gb|HM033396.1|\_Setophaga\_petechia\_voucher\_BIOUGCAN:TTP\_2340-88627\_cytochrome\_oxidase\_subunit\_1\_(COI)\_gene\_partial\_cds\_mitochondrial  
— gi|294513438|gb|HM033393.1|\_Setophaga\_petechia\_voucher\_BIOUGCAN:STA\_2480-53100\_cytochrome\_oxidase\_subunit\_1\_(COI)\_gene\_partial\_cds\_mitochondrial

0.01

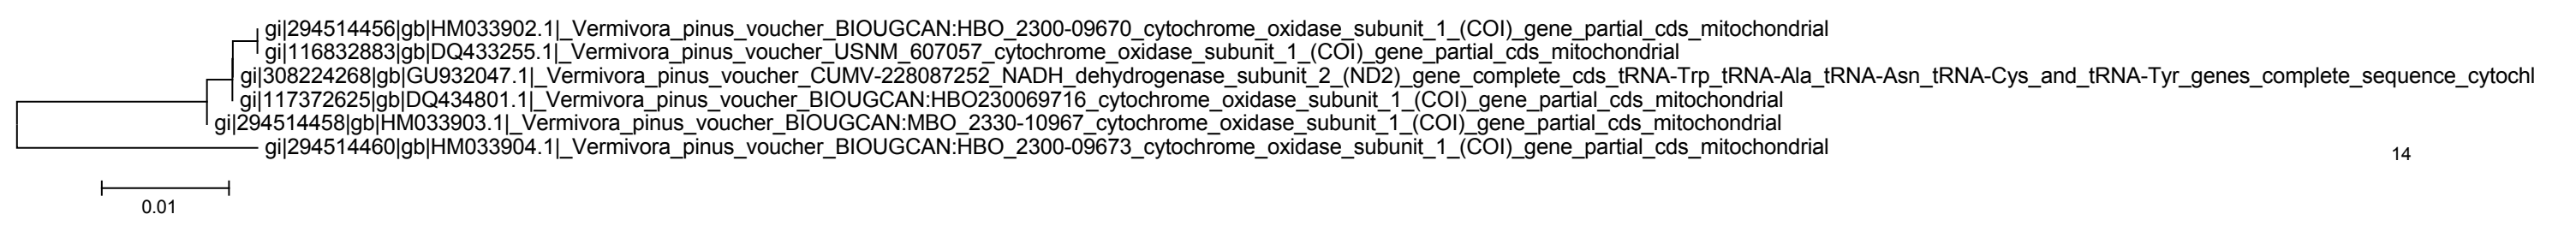

gj|117372085|gb|DQ434531.1|\_Catharus\_ustulatus\_voucher\_BIOUGCAN:HBO1461-21392\_cytochrome\_oxidase\_subunit\_1\_(COI)\_gene\_partial\_cds\_mitochondrial  
 — gj|197254897|gb|FJ027325.1|\_Catharus\_ustulatus\_voucher\_MACN-Or-ct\_768\_cytochrome\_oxidase\_subunit\_1\_(COI)\_gene\_partial\_cds\_mitochondrial  
 gj|294513240|gb|HM033294.1|\_Catharus\_ustulatus\_voucher\_BIOUGCAN:IWBS\_1871-73302\_cytochrome\_oxidase\_subunit\_1\_(COI)\_gene\_partial\_cds\_mitochondrial  
 gj|294513238|gb|HM033293.1|\_Catharus\_ustulatus\_voucher\_BIOUGCAN:IWBS\_1871-73280\_cytochrome\_oxidase\_subunit\_1\_(COI)\_gene\_partial\_cds\_mitochondrial  
 gj|294513226|gb|HM033287.1|\_Catharus\_ustulatus\_voucher\_BIOUGCAN:VLBO\_1461-18951\_cytochrome\_oxidase\_subunit\_1\_(COI)\_gene\_partial\_cds\_mitochondrial  
 — gj|294513214|gb|HM033281.1|\_Catharus\_ustulatus\_voucher\_BIOUGCAN:MKNO\_1871\_66510\_cytochrome\_oxidase\_subunit\_1\_(COI)\_gene\_partial\_cds\_mitochondrial  
 gj|294513212|gb|HM033280.1|\_Catharus\_ustulatus\_voucher\_BIOUGCAN:IWBS\_1871-73301\_cytochrome\_oxidase\_subunit\_1\_(COI)\_gene\_partial\_cds\_mitochondrial  
 gj|294513218|gb|HM033283.1|\_Catharus\_ustulatus\_voucher\_BIOUGCAN:IWBS\_1871-73291\_cytochrome\_oxidase\_subunit\_1\_(COI)\_gene\_partial\_cds\_mitochondrial  
 — gj|294513222|gb|HM033285.1|\_Catharus\_ustulatus\_voucher\_BIOUGCAN:MBO\_2241-30985\_cytochrome\_oxidase\_subunit\_1\_(COI)\_gene\_partial\_cds\_mitochondrial  
 gj|197254899|gb|FJ027326.1|\_Catharus\_ustulatus\_voucher\_MACN-Or-ct\_901\_cytochrome\_oxidase\_subunit\_1\_(COI)\_gene\_partial\_cds\_mitochondrial  
 gj|294513242|gb|HM033295.1|\_Catharus\_ustulatus\_voucher\_BIOUGCAN:VLBO\_1461-18971\_cytochrome\_oxidase\_subunit\_1\_(COI)\_gene\_partial\_cds\_mitochondrial  
 gj|294513230|gb|HM033289.1|\_Catharus\_ustulatus\_voucher\_BIOUGCAN:MKNO\_1871\_66567\_cytochrome\_oxidase\_subunit\_1\_(COI)\_gene\_partial\_cds\_mitochondrial  
 gj|294513216|gb|HM033282.1|\_Catharus\_ustulatus\_voucher\_BIOUGCAN:IWBS\_1871-73303\_cytochrome\_oxidase\_subunit\_1\_(COI)\_gene\_partial\_cds\_mitochondrial  
 gj|116876575|gb|DQ433457.1|\_Catharus\_ustulatus\_voucher\_CWS17004\_cytochrome\_oxidase\_subunit\_1\_(COI)\_gene\_partial\_cds\_mitochondrial  
 gj|116876579|gb|DQ433459.1|\_Catharus\_ustulatus\_voucher\_CWS17482\_cytochrome\_oxidase\_subunit\_1\_(COI)\_gene\_partial\_cds\_mitochondrial  
 gj|117372087|gb|DQ434532.1|\_Catharus\_ustulatus\_voucher\_BIOUGCAN:LPBO1861-63870\_cytochrome\_oxidase\_subunit\_1\_(COI)\_gene\_partial\_cds\_mitochondrial  
 gj|117372089|gb|DQ434533.1|\_Catharus\_ustulatus\_voucher\_BIOUGCAN:SPP1861-28195\_cytochrome\_oxidase\_subunit\_1\_(COI)\_gene\_partial\_cds\_mitochondrial  
 gj|294513234|gb|HM033291.1|\_Catharus\_ustulatus\_voucher\_BIOUGCAN:MKNO\_1871\_66509\_cytochrome\_oxidase\_subunit\_1\_(COI)\_gene\_partial\_cds\_mitochondrial  
 gj|294513232|gb|HM033290.1|\_Catharus\_ustulatus\_voucher\_BIOUGCAN:MKNO\_1871\_66513\_cytochrome\_oxidase\_subunit\_1\_(COI)\_gene\_partial\_cds\_mitochondrial  
 gj|197254895|gb|FJ027324.1|\_Catharus\_ustulatus\_voucher\_MACN-Or-ct\_1037\_cytochrome\_oxidase\_subunit\_1\_(COI)\_gene\_partial\_cds\_mitochondrial  
 gj|116876577|gb|DQ433458.1|\_Catharus\_ustulatus\_voucher\_CWS29850\_cytochrome\_oxidase\_subunit\_1\_(COI)\_gene\_partial\_cds\_mitochondrial  
 gj|51102254|gb|AY666579.1|\_Catharus\_ustulatus\_voucher\_1B-1398\_cytochrome\_oxidase\_subunit\_1\_(COI)\_gene\_partial\_cds\_mitochondrial  
 gj|294513228|gb|HM033288.1|\_Catharus\_ustulatus\_voucher\_BIOUGCAN:MKNO\_1871\_66512\_cytochrome\_oxidase\_subunit\_1\_(COI)\_gene\_partial\_cds\_mitochondrial  
 — gj|116876581|gb|DQ433460.1|\_Catharus\_ustulatus\_voucher\_CWS17485\_cytochrome\_oxidase\_subunit\_1\_(COI)\_gene\_partial\_cds\_mitochondrial  
 — gj|294513236|gb|HM033292.1|\_Catharus\_ustulatus\_voucher\_BIOUGCAN:RPBO\_1931\_28041\_cytochrome\_oxidase\_subunit\_1\_(COI)\_gene\_partial\_cds\_mitochondrial  
 gj|294513246|gb|HM033297.1|\_Catharus\_ustulatus\_voucher\_BIOUGCAN:RPBO\_1931\_28050\_cytochrome\_oxidase\_subunit\_1\_(COI)\_gene\_partial\_cds\_mitochondrial  
 — gj|294513244|gb|HM033296.1|\_Catharus\_ustulatus\_voucher\_BIOUGCAN:RPBO\_1931\_28049\_cytochrome\_oxidase\_subunit\_1\_(COI)\_gene\_partial\_cds\_mitochondrial  
 — gj|294513224|gb|HM033286.1|\_Catharus\_ustulatus\_voucher\_BIOUGCAN:RPBO\_1931\_28031\_cytochrome\_oxidase\_subunit\_1\_(COI)\_gene\_partial\_cds\_mitochondrial  
 — gj|294513220|gb|HM033284.1|\_Catharus\_ustulatus\_voucher\_BIOUGCAN:RPBO\_1931\_28051\_cytochrome\_oxidase\_subunit\_1\_(COI)\_gene\_partial\_cds\_mitochondrial  
 gj|197365447|gb|EU834853.1|\_Catharus\_ustulatus\_cytochrome\_oxidase\_subunit\_1\_(COI)\_gene\_partial\_cds\_mitochondrial

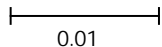
 0.01



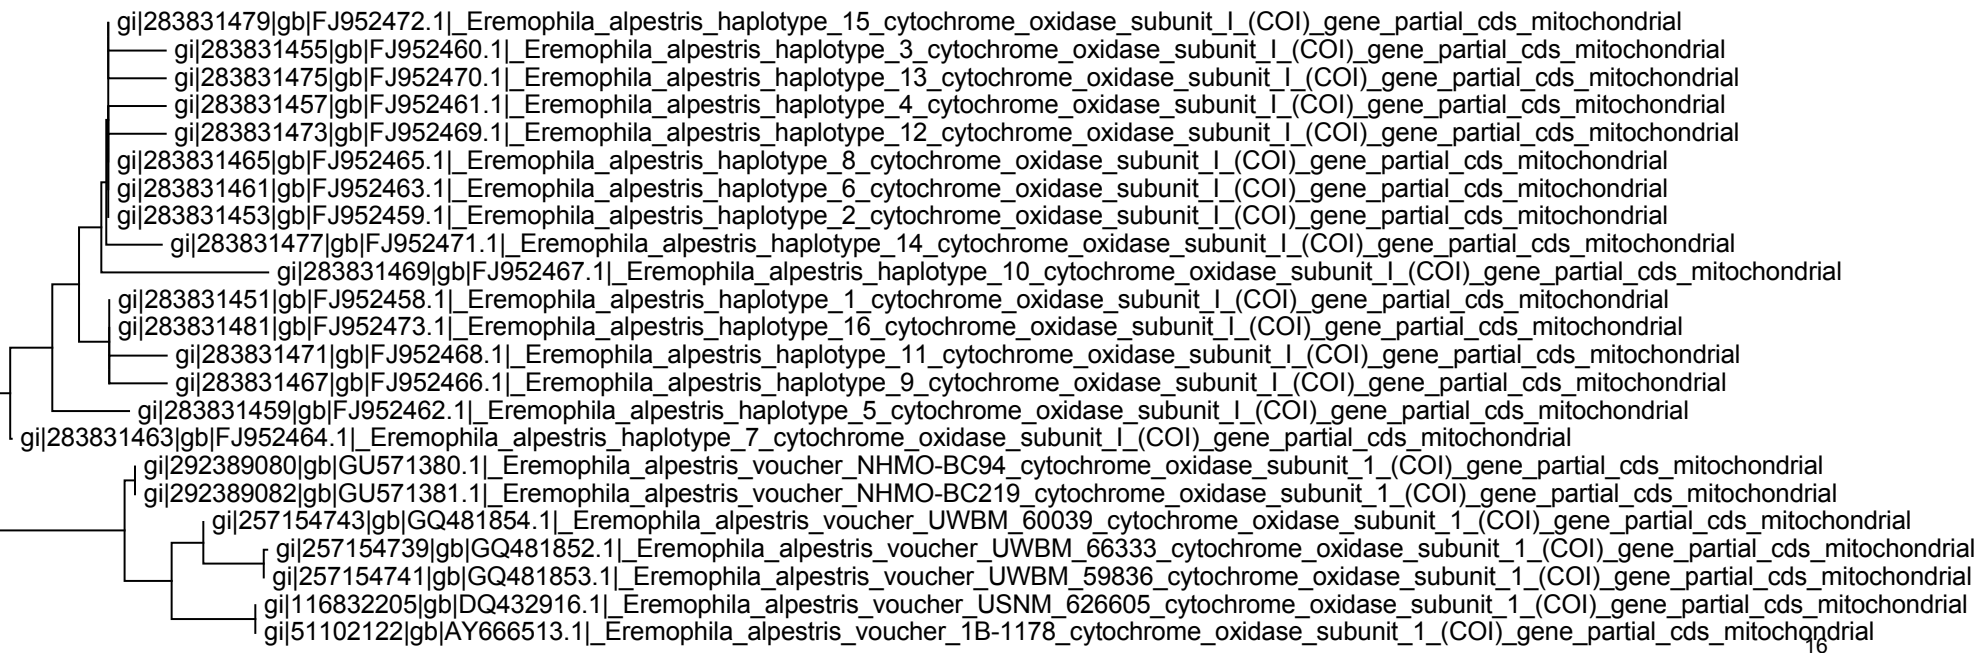

0.01

gi|197255555|gb|FJ027654.1|\_Hirundo\_rustica\_voucher\_MACN-Or-ct\_1843\_cytochrome\_oxidase\_subunit\_1\_(COI)\_gene\_partial\_cds\_mitochondrial  
 gi|197255557|gb|FJ027655.1|\_Hirundo\_rustica\_voucher\_MACN-Or-ct\_1845\_cytochrome\_oxidase\_subunit\_1\_(COI)\_gene\_partial\_cds\_mitochondrial  
 gi|117372229|gb|DQ434603.1|\_Hirundo\_rustica\_voucher\_BIOUGCAN:IPBO2350-69055\_cytochrome\_oxidase\_subunit\_1\_(COI)\_gene\_partial\_cds\_mitochondrial  
 gi|197255553|gb|FJ027653.1|\_Hirundo\_rustica\_voucher\_MACN-Or-ct\_1844\_cytochrome\_oxidase\_subunit\_1\_(COI)\_gene\_partial\_cds\_mitochondrial  
 gi|292388726|gb|GU571203.1|\_Hirundo\_rustica\_voucher\_NHMO-BC267\_cytochrome\_oxidase\_subunit\_1\_(COI)\_gene\_partial\_cds\_mitochondrial  
 gi|292388724|gb|GU571202.1|\_Hirundo\_rustica\_voucher\_NHMO-BC268\_cytochrome\_oxidase\_subunit\_1\_(COI)\_gene\_partial\_cds\_mitochondrial  
 gi|294513612|gb|HM033480.1|\_Hirundo\_rustica\_voucher\_BIOUGCAN:NCHA\_243065727\_cytochrome\_oxidase\_subunit\_1\_(COI)\_gene\_partial\_cds\_mitochondrial  
 gi|51102066|gb|AY666485.1|\_Hirundo\_rustica\_voucher\_1B-2581\_cytochrome\_oxidase\_subunit\_1\_(COI)\_gene\_partial\_cds\_mitochondrial  
 gi|51102062|gb|AY666483.1|\_Hirundo\_rustica\_voucher\_1B-2709\_cytochrome\_oxidase\_subunit\_1\_(COI)\_gene\_partial\_cds\_mitochondrial  
 gi|327555306|gb|JF499136.1|\_Hirundo\_rustica\_voucher\_USNM:641893\_cytochrome\_oxidase\_subunit\_1\_(COI)\_gene\_partial\_cds\_mitochondrial  
 gi|327555308|gb|JF499137.1|\_Hirundo\_rustica\_voucher\_USNM:641817\_cytochrome\_oxidase\_subunit\_1\_(COI)\_gene\_partial\_cds\_mitochondrial  
 gi|257155003|gb|GQ481984.1|\_Hirundo\_rustica\_voucher\_UWBM\_47366\_cytochrome\_oxidase\_subunit\_1\_(COI)\_gene\_partial\_cds\_mitochondrial  
 gi|257154999|gb|GQ481982.1|\_Hirundo\_rustica\_voucher\_UWBM\_60079\_cytochrome\_oxidase\_subunit\_1\_(COI)\_gene\_partial\_cds\_mitochondrial  
 gi|257155001|gb|GQ481983.1|\_Hirundo\_rustica\_voucher\_UWBM\_44441\_cytochrome\_oxidase\_subunit\_1\_(COI)\_gene\_partial\_cds\_mitochondrial  
 gi|298105633|gb|GU460337.1|\_Hirundo\_rustica\_rustica\_isolate\_49276\_cytochrome\_oxidase\_subunit\_1\_(COI)\_gene\_partial\_cds\_mitochondrial  
 gi|327494228|gb|JF498783.1|\_Hirundo\_rustica\_voucher\_USNM\_641332\_cytochrome\_oxidase\_subunit\_1\_(COI)\_gene\_partial\_cds\_mitochondrial  
 gi|327494224|gb|JF498781.1|\_Hirundo\_rustica\_voucher\_USNM\_641334\_cytochrome\_oxidase\_subunit\_1\_(COI)\_gene\_partial\_cds\_mitochondrial  
 gi|327494226|gb|JF498782.1|\_Hirundo\_rustica\_voucher\_USNM\_641333\_cytochrome\_oxidase\_subunit\_1\_(COI)\_gene\_partial\_cds\_mitochondrial  
 gi|292390168|gb|GU571924.1|\_Hirundo\_rustica\_voucher\_BISE-Aves354\_cytochrome\_oxidase\_subunit\_1\_(COI)\_gene\_partial\_cds\_mitochondrial  
 gi|292389186|gb|GU571433.1|\_Hirundo\_rustica\_voucher\_NHMO-BC308\_cytochrome\_oxidase\_subunit\_1\_(COI)\_gene\_partial\_cds\_mitochondrial  
 gi|292390170|gb|GU571925.1|\_Hirundo\_rustica\_voucher\_BISE-Aves21\_cytochrome\_oxidase\_subunit\_1\_(COI)\_gene\_partial\_cds\_mitochondrial  
 gi|292389184|gb|GU571432.1|\_Hirundo\_rustica\_voucher\_NHMO-BC309\_cytochrome\_oxidase\_subunit\_1\_(COI)\_gene\_partial\_cds\_mitochondrial  
 gi|257155007|gb|GQ481986.1|\_Hirundo\_rustica\_voucher\_UWBM\_61435\_cytochrome\_oxidase\_subunit\_1\_(COI)\_gene\_partial\_cds\_mitochondrial  
 gi|257155005|gb|GQ481985.1|\_Hirundo\_rustica\_voucher\_UWBM\_46396\_cytochrome\_oxidase\_subunit\_1\_(COI)\_gene\_partial\_cds\_mitochondrial

0.01

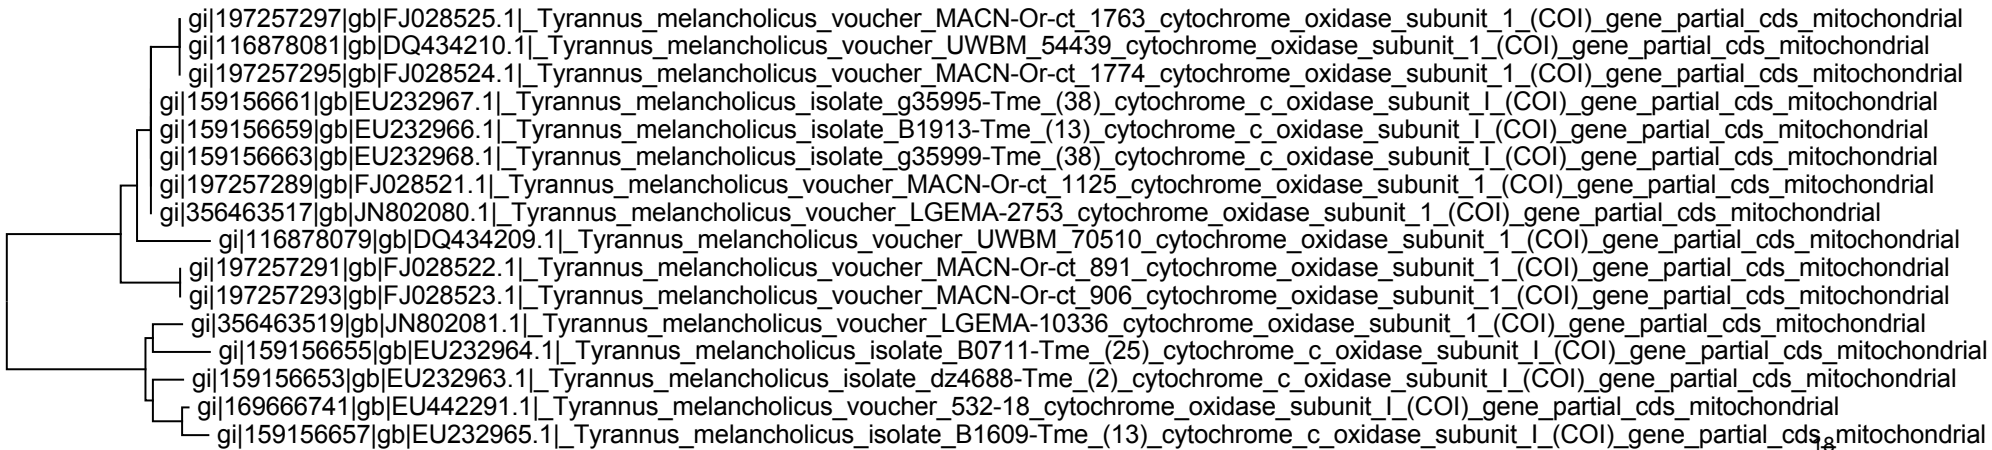

0.01

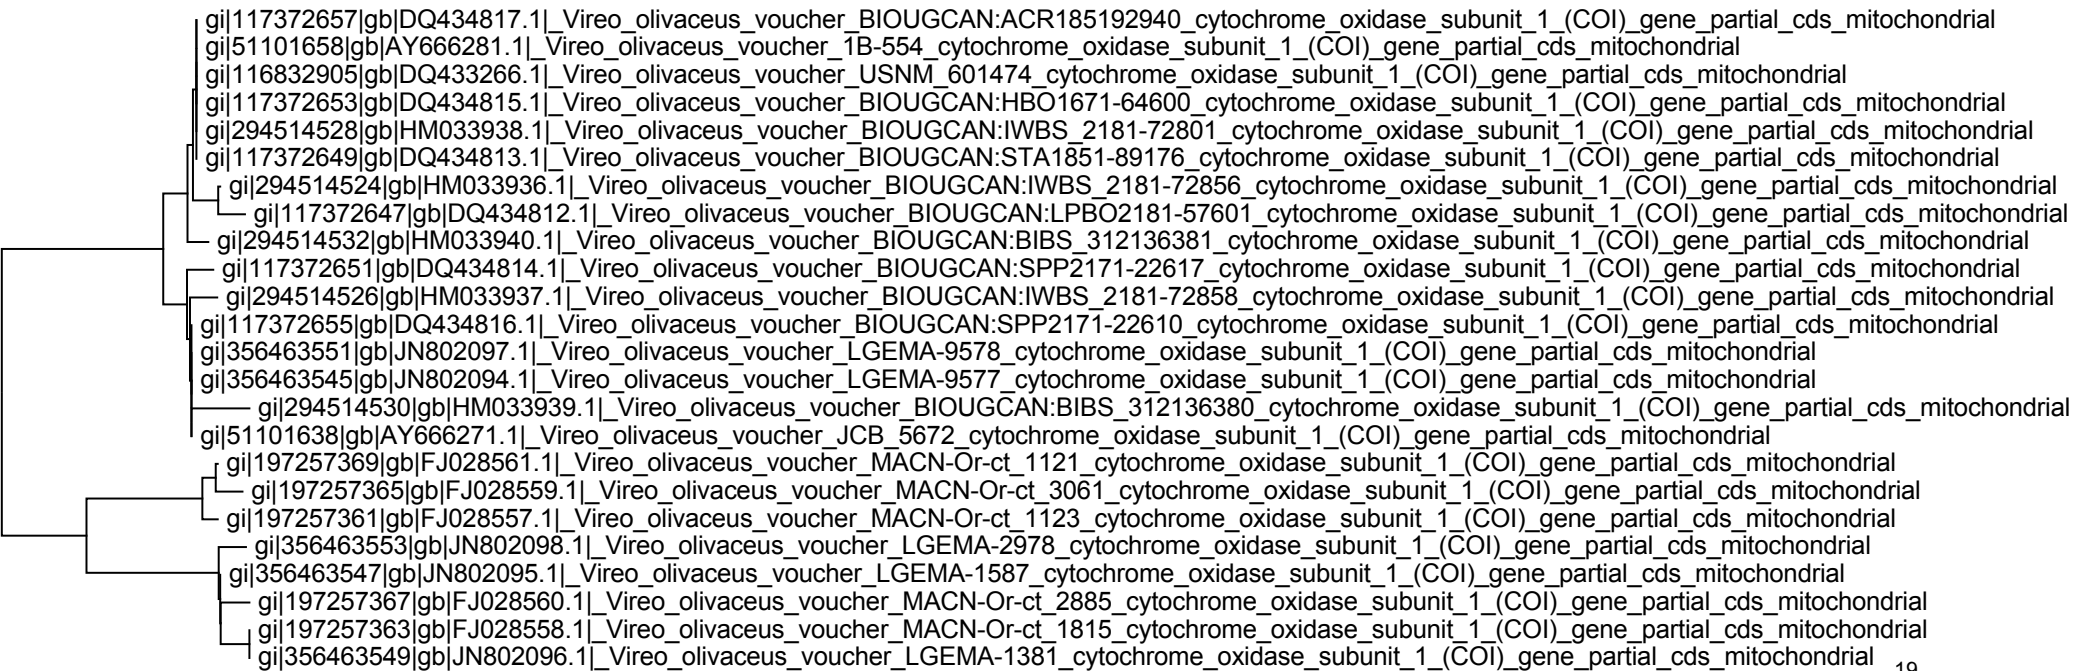

0.01
