# Supplementary material for: DNA Barcoding Works in Practice but Not in (Neutral) Theory
Source: PubMed Central journal article supplement (PMC4079456; doi:10.1371/journal.pone.0100755), 2014-07-02

**Fig. S6. Intraspecific cytochrome b variation unrelated to sample size.** Data from Nabholz 2009 dataset (185 species).

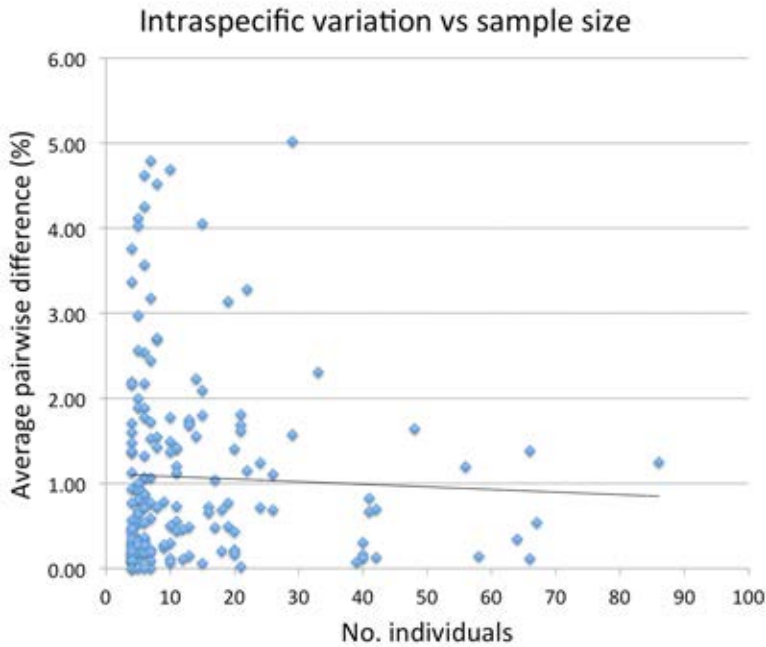

Supplement: pone.0100755.s006.pdf [file pone.0100755.s006.pdf]
