# Supplementary material for: DNA Barcoding Works in Practice but Not in (Neutral) Theory
Source: PubMed Central journal article supplement (PMC4079456; doi:10.1371/journal.pone.0100755), 2014-07-02
Supplement: pone.0100755.s008.pdf [file pone.0100755.s008.pdf]

**Table S2. Variation within avian geographic, hybrid clusters is low.** Outlier species highlighted in Table S1 are shown with clusters analyzed separately. For each cluster, number of individuals, average and maximum variation (values  $\geq 0.5\%$  average or  $\geq 1.5\%$  maximum highlighted in green), geographic range or hybridizing species, and supporting references are listed. Maps of collection locations and corresponding clusters are available in Supporting Information Figs. S2-S5.

|                                             |                                  | No. indivs | ave K2P519 | maxK2P519 | Range                       | Supporting references |
|---------------------------------------------|----------------------------------|------------|------------|-----------|-----------------------------|-----------------------|
| <b>Scolopacidae (Sandpipers and allies)</b> |                                  |            |            |           |                             |                       |
| Dunlin                                      | <i>Calidris alpina</i>           | 4          | 0.0000     | 0.0000    | Europe                      | 1                     |
|                                             | <i>Calidris alpina</i>           | 3          | 0.3868     | 0.0000    | e Palearctic, Alaska        |                       |
|                                             | <i>Calidris alpina</i>           | 2          | 0.0000     | 0.3868    | N America                   |                       |
| Black-tailed Godwit                         | <i>Limosa limosa</i>             | 55         | 0.0343     | 0.3868    | w Palearctic                | 2                     |
|                                             | <i>Limosa limosa</i>             | 5          | 0.0000     | 0.0000    | e Palearctic                |                       |
| Whimbrel                                    | <i>Numenius phaeopus</i>         | 9          | 0.2832     | 0.5814    | Europe                      | 3                     |
|                                             | <i>Numenius phaeopus</i>         | 5          | 0.0783     | 0.2041    | N America                   |                       |
| Solitary Sandpiper                          | <i>Tringa solitaria</i>          | 9          | 0.1396     | 0.3884    | w N America, Argentina      | 4                     |
|                                             | <i>Tringa solitaria</i>          | 4          | 0.0000     | 0.0000    | e N America                 |                       |
| Common Redshank                             | <i>Tringa totanus</i>            | 11         | 0.0351     | 0.1931    | w Palearctic                |                       |
|                                             | <i>Tringa totanus</i>            | 6          | 0.0000     | 0.0000    | e Palearctic                |                       |
| <b>Parulidae (New World warblers)</b>       |                                  |            |            |           |                             |                       |
| Golden-crowned Warbler                      | <i>Basileuterus culicivorus</i>  | 6          | 0.1934     | 0.5814    | Argentina, Brazil           | 5                     |
|                                             | <i>Basileuterus culicivorus</i>  | 1          | -          | -         | Bolivia                     |                       |
|                                             | <i>Basileuterus culicivorus</i>  | 1          | -          | -         | Trinidad                    |                       |
| Wilson's Warbler                            | <i>Cardellina pusilla</i>        | 22         | 0.2840     | 0.9712    | w N America                 | 6                     |
|                                             | <i>Cardellina pusilla</i>        | 10         | 0.2508     | 0.9988    | e N America                 |                       |
| Masked Yellowthroat                         | <i>Geothlypis aequinoctialis</i> | 5          | 0.2319     | 0.5806    | e Argentina, Uruguay        | 7                     |
|                                             | <i>Geothlypis aequinoctialis</i> | 1          | -          | -         | w Argentina                 |                       |
| Brown-capped Whitestart                     | <i>Myioborus bruniceps</i>       | 4          | 0.0000     | 0.0000    | Argentina                   | 8                     |
|                                             | <i>Myioborus bruniceps</i>       | 2          | 0.1930     | 0.1930    | Guyana, Venezuela           |                       |
| Slate-throated Whitestart                   | <i>Myioborus miniatus</i>        | 4          | 0.3871     | 0.5814    | Panama                      | 8                     |
|                                             | <i>Myioborus miniatus</i>        | 2          | 0.0000     | 0.0000    | Guyana                      |                       |
| Painted Redstart                            | <i>Myioborus pictus</i>          | 1          | -          | -         | Arizona                     |                       |
|                                             | <i>Myioborus pictus</i>          | 1          | -          | -         | s Mexico                    |                       |
| Two-banded Warbler                          | <i>Myiothlypis bivittata</i>     | 3          | 0.5170     | 0.7755    | Argentina, Bolivia          | 9                     |
|                                             | <i>Myiothlypis bivittata</i>     | 3          | 0.1286     | 0.1930    | Guyana, Venezuela           |                       |
| Russet-crowned Warbler                      | <i>Myiothlypis coronata</i>      | 1          | -          | -         | Peru                        | 9                     |
|                                             | <i>Myiothlypis coronata</i>      | 1          | -          | -         | Ecuador                     |                       |
| Buff-rumped Warbler                         | <i>Myiothlypis fulvicauda</i>    | 1          | -          | -         | n Panama                    | 10                    |
|                                             | <i>Myiothlypis fulvicauda</i>    | 1          | -          | -         | s Panama                    |                       |
|                                             | <i>Myiothlypis fulvicauda</i>    | 1          | -          | -         | Brazil                      |                       |
| Nashville Warbler                           | <i>Oreothlypis ruficapilla</i>   | 7          | 0.3893     | 0.9807    | e N America                 | 11                    |
|                                             | <i>Oreothlypis ruficapilla</i>   | 2          | 0.0000     | 0.0000    | w N America                 |                       |
| Yellow Warbler                              | <i>Setophaga petechia</i>        | 16         | 0.0483     | 0.3868    | e N America                 | 12                    |
|                                             | <i>Setophaga petechia</i>        | 16         | 0.1208     | 0.7755    | w N America                 |                       |
| Cape May Warbler                            | <i>Setophaga tigrina</i>         | 8          | 0.4432     | 1.5969    | N Amer                      |                       |
| Blue-winged Warbler                         | <i>Vermivora cyanoptera</i>      | 5          | 0.1932     | 0.3868    | <i>V. cyanoptera</i> group  | 13                    |
|                                             | <i>Vermivora cyanoptera</i>      | 1          | -          | -         | <i>V. chrysoptera</i> group |                       |
| <b>Highly abundant &gt; 100M</b>            |                                  |            |            |           |                             |                       |
| Swainson's Thrush                           | <i>Catharus ustulatus</i>        | 24         | 0.0992     | 0.8126    | inland N America            | 14,15                 |
|                                             | <i>Catharus ustulatus</i>        | 6          | 0.3097     | 0.5814    | Pacific coast N America     |                       |
| Horned Lark                                 | <i>Eremophila alpestris</i>      | 16         | 0.4002     | 0.9728    | China                       | 16                    |
|                                             | <i>Eremophila alpestris</i>      | 3          | 0.1290     | 0.1941    | Russia                      |                       |
|                                             | <i>Eremophila alpestris</i>      | 2          | 0.0000     | 0.0000    | Norway                      |                       |
|                                             | <i>Eremophila alpestris</i>      | 2          | 0.0000     | 0.0000    | US                          |                       |
| Barn Swallow                                | <i>Hirundo rustica</i>           | 10         | 0.0386     | 0.1931    | Europe                      | 17                    |
|                                             | <i>Hirundo rustica</i>           | 9          | 0.0430     | 0.1946    | N America                   |                       |
|                                             | <i>Hirundo rustica</i>           | 5          | 0.0000     | 0.0000    | Japan                       |                       |
| Common Starling                             | <i>Sturnus vulgaris</i>          | 23         | 0.6259     | 2.3638    | World                       |                       |
| Tropical Kingbird                           | <i>Tyrannus melancholicus</i>    | 11         | 0.3808     | 1.1696    | Argentina, Brazil           |                       |
|                                             | <i>Tyrannus melancholicus</i>    | 5          | 0.5654     | 0.7767    | Brazil, Guatemala           |                       |
| Red-eyed vireo                              | <i>Vireo olivaceus</i>           | 16         | 0.3910     | 1.1696    | N Amer                      | 18                    |
|                                             | <i>Vireo olivaceus</i>           | 5          | 0.2706     | 0.3868    | Brazil, Argentina           |                       |
|                                             | <i>Vireo olivaceus</i>           | 3          | 0.2575     | 0.3864    | Argentina                   |                       |
