# Supplementary material for: DNA Barcoding Works in Practice but Not in (Neutral) Theory
Source: PubMed Central journal article supplement (PMC4079456; doi:10.1371/journal.pone.0100755), 2014-07-02
Supplement: pone.0100755.s010.pdf [file pone.0100755.s010.pdf]

**Table S4. Avian species with shared barcode clusters.** Sets and pairs identified in four large series (48,77,127,128) are shown.

| No. species in cluster | Species name 1                    | Species name 2                                                                              | resolvable by barcode (Y/N),<br>single sequence overlap (S),<br>proposed lump (L) | hybridization (H), introgression<br>(I), young species (Y) | Comments                                                              | References |
|------------------------|-----------------------------------|---------------------------------------------------------------------------------------------|-----------------------------------------------------------------------------------|------------------------------------------------------------|-----------------------------------------------------------------------|------------|
| 2                      | <i>Aechmophorus occidentalis</i>  | <i>A. clarkii</i>                                                                           | N                                                                                 | -                                                          | no other information                                                  |            |
| 2                      | <i>Anas discors</i>               | <i>A. cyanoptera</i>                                                                        | N                                                                                 | H,I                                                        | hybridization; introgression 70 Ka                                    | 96         |
| 2                      | <i>Anas flavirostris</i>          | <i>A. sibilatrix</i>                                                                        | N                                                                                 | H,I                                                        | hybridization; share divergent lineages with other <i>Anas</i> spp    |            |
| 3                      | <i>Anas rubripes</i>              | <i>A. platyrhynchos, fulvigula</i>                                                          | N                                                                                 | H,I                                                        | hybridization                                                         | 97-99      |
| 3                      | <i>Anser brachyrhynchus</i>       | <i>A. erythropus, A. fabalis</i>                                                            | N                                                                                 | H,I                                                        | hybridization                                                         | 100        |
| 2                      | <i>Basileuterus culicivorus</i>   | <i>B. hypoleucus</i>                                                                        | N,L                                                                               | -                                                          | lump with hypoleucus see ref                                          | 5          |
| 2                      | <i>Carduelis flammea</i>          | <i>C. hornemanni</i>                                                                        | N,L                                                                               | -                                                          | no differentiation by other mtDNA, microsatellite                     | 101        |
| 2                      | <i>Celeus elegans</i>             | <i>C. lugubris</i>                                                                          | N                                                                                 | I                                                          | introgression see ref                                                 | 102        |
| 2                      | <i>Chen caerulescens</i>          | <i>C. rossii</i>                                                                            | N                                                                                 | H,I                                                        | hybridization; share divergent CR lineages                            | 100,103    |
| 2                      | <i>Corvus brachyrhynchus</i>      | <i>C. caurinus</i>                                                                          | N,L                                                                               | -                                                          | no differentiation by other mtDNA loci                                | 104,105    |
| 2                      | <i>Gymnophis rufigula</i>         | <i>G. leucaspis</i>                                                                         | S                                                                                 | -                                                          | 1 leucaspis in rufigula cluster                                       |            |
| 2                      | <i>Herpsilochmus atricapillus</i> | <i>H. sellowi</i>                                                                           | S                                                                                 | -                                                          | 1 sellowi between 2 atricapillus clusters                             |            |
| 2                      | <i>Hylophilus ochraceiceps</i>    | <i>H. semicinereus</i>                                                                      | S                                                                                 | -                                                          | 1 semicinereus matches 1 ochraceiceps; multiple ochraceiceps clusters |            |
| 2                      | <i>Junco hyemalis</i>             | <i>J. phaeonotus</i>                                                                        | N                                                                                 | Y                                                          | young species 10 Ka                                                   | 106        |
| 8                      | <i>Larus argentatus</i>           | <i>L. californicus, fuscus, glaucescens, glaucoides, hyperboreus, thayeri, occidentalis</i> | N                                                                                 | H,I                                                        | hybridization; introgression                                          | 31,32,107  |
| 2                      | <i>Leucophaeus atricilla</i>      | <i>L. pipixcan</i>                                                                          | S                                                                                 | -                                                          | 1 atricilla paraphyletic; pipixcan cluster distinct                   |            |

|   |                                 |                                                                              |   |     |                                                                         |         |
|---|---------------------------------|------------------------------------------------------------------------------|---|-----|-------------------------------------------------------------------------|---------|
| 2 | <i>Loxia curvirostra</i>        | <i>L. pytyopsittacus</i>                                                     | N | Y   | young species 10 Ka                                                     | 108,109 |
| 3 | <i>Muscisaxicola flavinucha</i> | <i>M. cinereus, rufivertex</i>                                               | Y | -   | 2 diagnostic sites rufivertex; 1 diagnostic site flavinucha vs cinereus | 110     |
| 2 | <i>Pica hudsonia</i>            | <i>Pica nuttalli</i>                                                         | Y | -   | 1 diagnostic site                                                       | 111     |
| 2 | <i>Picumnus pygmaeus</i>        | <i>P. temminckii</i>                                                         | S | -   | 1 pygmaeus, differs 1.4% vs temminckii                                  |         |
| 2 | <i>Plectrophenax nivalis</i>    | <i>P. hyperboreus</i>                                                        | N | H,I | hybridization, documented by AFLP; speciation 18K-73 Ka                 | 112     |
| 2 | <i>Quiscalis mexicanus</i>      | <i>Q. major</i>                                                              | Y | -   | 1 diagnostic site; major is distinct clade within mexicanus             | 113     |
| 2 | <i>Setophaga occidentalis</i>   | <i>S. townsendi</i>                                                          | N | H,I | hybridization, Townsend's replacing Hermit                              | 114     |
| 2 | <i>Somateria spectabilis</i>    | <i>S. mollissima</i>                                                         | N | H,I | hybridization; CR 2 clusters, 1 mixed                                   | 100     |
| 2 | <i>Sphyrapicus nuchalis</i>     | <i>S. ruber</i>                                                              | N | H,I | hybridization                                                           | 115     |
| 8 | <i>Sporophila bouvreil</i>      | <i>S. cinnamomea, hypochroma, hypoxantha, palustris, ruficollis, zelichi</i> | N | H,I | hybridization, introgression                                            | 116     |
| 2 | <i>Synallaxis gujanensis</i>    | <i>S. rutilans</i>                                                           | S | -   | 1 gujanensis in rutilans cluster; others distant                        |         |
| 2 | <i>Tachyeres patachonicus</i>   | <i>T. pteneres</i>                                                           | S | -   | 1 patachonicus close to 2 pteneres                                      |         |
| 2 | <i>Thraupis palmarum</i>        | <i>T. sayaca</i>                                                             | S | -   | 1 palmarum matches sayaca, others distant                               |         |
| 2 | <i>Turdus albicollis</i>        | <i>T. leucomelas</i>                                                         | N | -   | no other information                                                    |         |
| 3 | <i>Tympanuchus phasianellus</i> | <i>T. cupido, pallidicinctus</i>                                             | N | H,I | hybridization; also recent speciation 10-80 Ka                          | 100,117 |
| 2 | <i>Venilornis passerinus</i>    | <i>V. frontalis</i>                                                          | Y | -   | 1 diagnostic site                                                       |         |
| 2 | <i>Zonotricha atricapilla</i>   | <i>Z. leucophrys</i>                                                         | N | I   | introgression; differ by AFLP                                           | 118     |
